# Supplementary material for: Comparative Study of Allosteric GPCR Binding Sites and Their Ligandability Potential
Source: PubMed Central journal article supplement — J Chem Inf Model. 2024 Oct 23;64(21):8176–92. doi: 10.1021/acs.jcim.4c00819 (PMC11558664; doi:10.1021/acs.jcim.4c00819), 2024-10-23
Supplement: ci4c00819_si_001.pdf [file ci4c00819_si_001.pdf]

1 **Supporting Information**

2 **Comparative Study of Allosteric GPCR Binding Sites and Their**  
3 **Ligandability Potential**

4 *Sonja Peter<sup>1,2</sup>, Lydia Siragusa<sup>3,4</sup>, Morgan Thomas<sup>1,6</sup>, Tommaso Palomba<sup>3</sup>, Simon Cross<sup>3</sup>, Noel M.*  
5 *O'Boyle<sup>1</sup>, Dávid Bajusz<sup>5</sup>, György G. Ferenczy<sup>5</sup>, György M. Keserű<sup>5</sup>, Giovanni Bottegoni<sup>2,7</sup>, Brian*  
6 *Bender<sup>1</sup>, Ijen Chen<sup>1\*</sup>, Chris De Graaf<sup>1\*</sup>*

7 <sup>1</sup>Nxera Pharma UK, Computational Chemistry, Steinmetz Building, Granta Park, Cambridge  
8 CB21 6DG, UK. \*ijen.chen@nxera.life; \*chrisdgrf@gmail.com

9 <sup>2</sup>Department of Biomolecular Sciences, University of Urbino Carlo Bo, Piazza Rinascimento 6,  
10 61029 Urbino, Italy

11 <sup>3</sup>Molecular Discovery Ltd., Kinetic Business Centre, Theobald Street, Elstree, Borehamwood,  
12 WD6 4PJ Hertfordshire, United Kingdom

13 <sup>4</sup>Molecular Horizon srl, via Montelino 30, 06084 Bettona (PG), Italy

14 <sup>5</sup>Medicinal Chemistry Research Group and Drug Innovation Centre, HUN-REN Research Centre  
15 for Natural Sciences, Magyar tudósok krt. 2, 1117 Budapest, Hungary

16 <sup>6</sup>Yusuf Hamied Department of Chemistry, University of Cambridge, CB2 1EW Cambridge,  
17 United Kingdom

18 <sup>7</sup>Institute of Clinical Sciences, University of Birmingham, Edgbaston, B15 2TT Birmingham,  
19 United Kingdom

20

21 **Table S1.** Mechanisms of action observed by GPCR modulators (modified from Congreve et al.<sup>4</sup>, Fasciani  
22 et al.<sup>53</sup> and Grundmann et al.<sup>54</sup>)

**Orthosteric Agonist**

When endogenous or synthetic agonists bind to the primary binding site, they cause a change in receptor conformation, which stabilizes an active state of the receptor.

**Positive Allosteric Modulator (PAM)**

PAMs bind to an allosteric site on the receptor separate from the endogenous binding pocket, increasing the affinity and/or efficacy of an orthosteric ligand resulting in enhanced receptor activation when an orthosteric ligand is present.

**Allosteric Agonist**

The binding of an allosteric agonist alone is sufficient to activate the receptor. These compounds also enhance the affinity and/or efficacy of an orthosteric ligand.

**Orthosteric Antagonist**

When orthosteric antagonists bind to a receptor, it prevents the activation of that receptor.

**Negative Allosteric Modulator (NAM)**

NAMs bind to an allosteric site on the receptor separate from the endogenous binding pocket, reducing the affinity and/or efficacy of an orthosteric ligand resulting in a decrease in receptor activation when an orthosteric ligand is present.

**Allosteric Antagonist**

The binding of an allosteric antagonist alone is sufficient to prevent receptor activation. These compounds also decrease the affinity and/or efficacy of an orthosteric ligand.

**Biased Allosteric Modulator (BAM)**

A biased allosteric modulator is a substance that selectively influences one signaling pathway over others by binding to an allosteric site on a protein, resulting in a biased or specific cellular response.

A FDA approved GPCR drugs

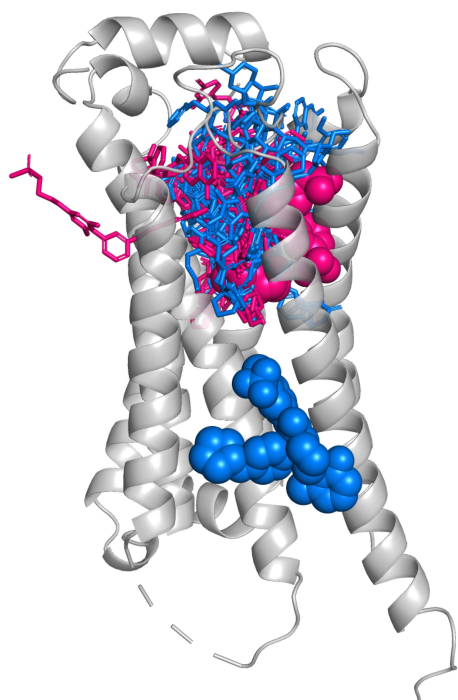

B

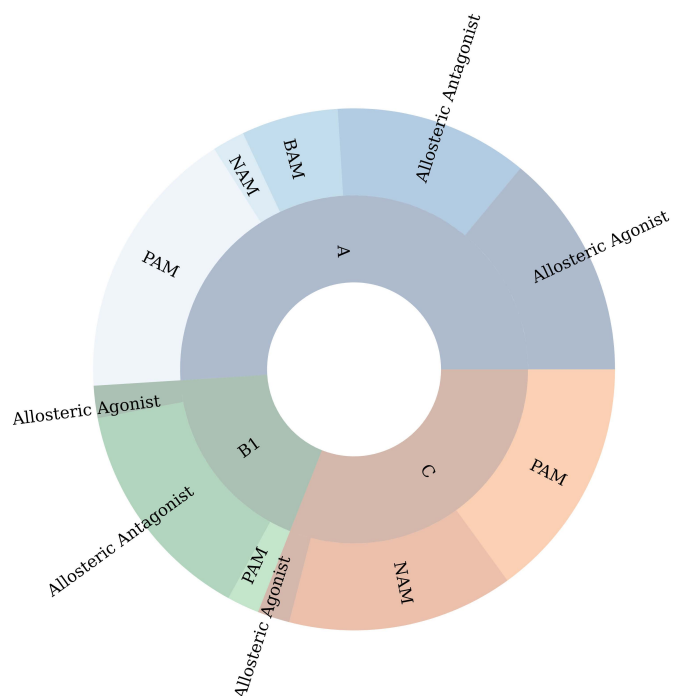

23

24 **Figure S1.** Overview of public structural information on allosteric small molecule bound GPCRs  
25 (December 2023). (A) Overlay of all structurally resolved orthosteric (sticks) and allosteric (spheres) FDA  
26 approved drugs (N=217). Modulators that activate GPCR activity are pink and those that inhibit GPCR  
27 activity are blue. (B) Nested pie chart depicts the allosteric ligand modalities covered by Class A, B1, and  
28 C publicly available allosteric PDB dataset. Specifically, ligand-bound structures with Allosteric Agonist  
29 (A: 14, B1: 2, C: 2), Allosteric Antagonists (A: 12, B1: 14), Positive Allosteric Modulators (PAM. A: 17,  
30 B1: 2, C: 15), Negative Allosteric Modulators (NAM, A: 2, C: 14), and Biased Allosteric Modulators (BAM,  
31 A: 6) are known. Refer to Table S1 for the explanation of binding modes.

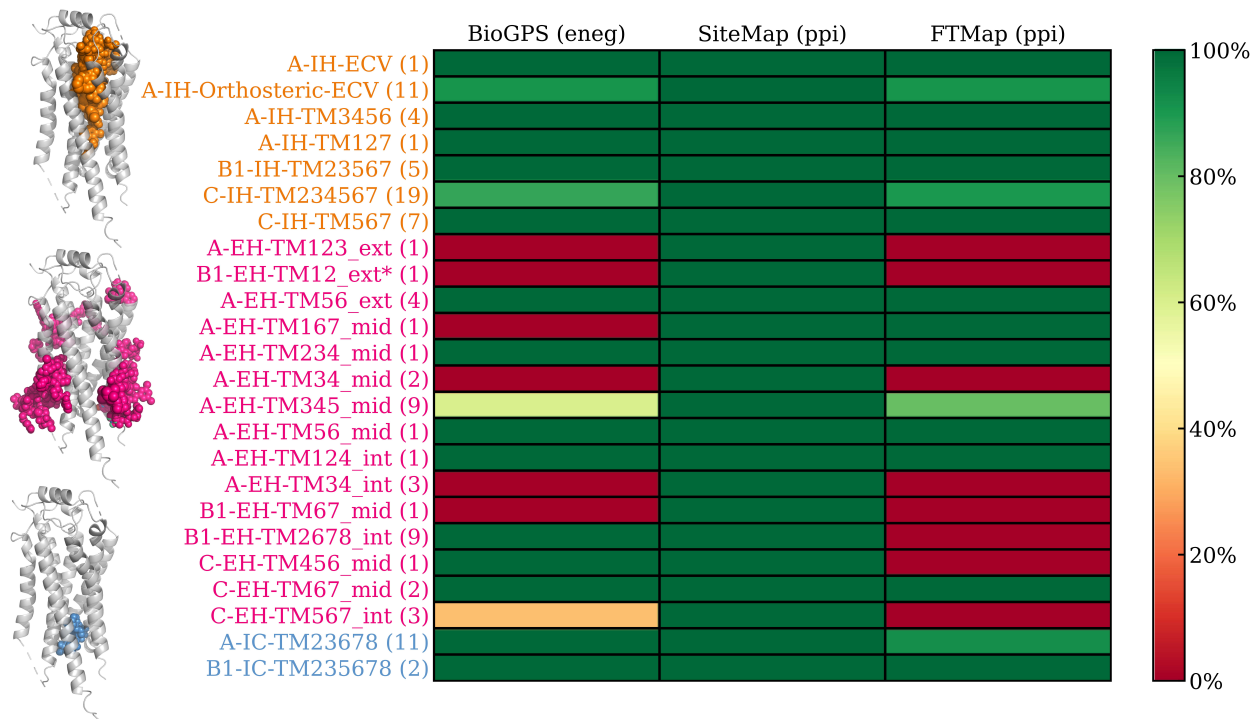

32

33 **Figure S2.** Binding site detection of known allosteric inhibitors for BioGPS, SiteMap, and FTMap. BioGPS  
 34 was run using energetic probes (eneg) to detect binding sites (2.2b). SiteMap and FTMap were run with the  
 35 flag that allows for the detection of shallow binding pockets (ppi). The site detection was also counted if  
 36 only a subpocket was detected. The binding sites are differentiated by their location within the receptor:  
 37 intrahelical binders are shown in orange spheres, extrahelical modulators are depicted as pink spheres, and  
 38 intracellular ligands are illustrated as blue spheres. The number following the binding site annotation  
 39 indicates the number of structures with a known allosteric ligand. The total number is 101, instead of 100  
 40 as PDB: 8JD5 has two allosteric ligands binding at C-IH-TM234567 and C-EH-TM67\_mid, respectively.  
 41 Additionally, the image shows the overlay of all the binding sites to the sphingosine 1-phosphate receptor  
 42 1 (S1PR1) in a grey ribbon (PDB: 7EO4). All intrahelical allosteric ligands bind at a site distinct from the  
 43 endogenous ligand. ACM2, ACM4, GPR52, and MRGX1 bind in the extracellular vestibule. The pocket-  
 44 first approach assigns them to A-IH-Orthosteric-ECV as the pocket obtained by the binding site detection  
 45 tool extends into the orthosteric site. \*Similarly, the allosteric ligand of GLP1R binds between TM1 and  
 46 TM2; the pocket obtained by the binding site detection tools extends into the orthosteric site.

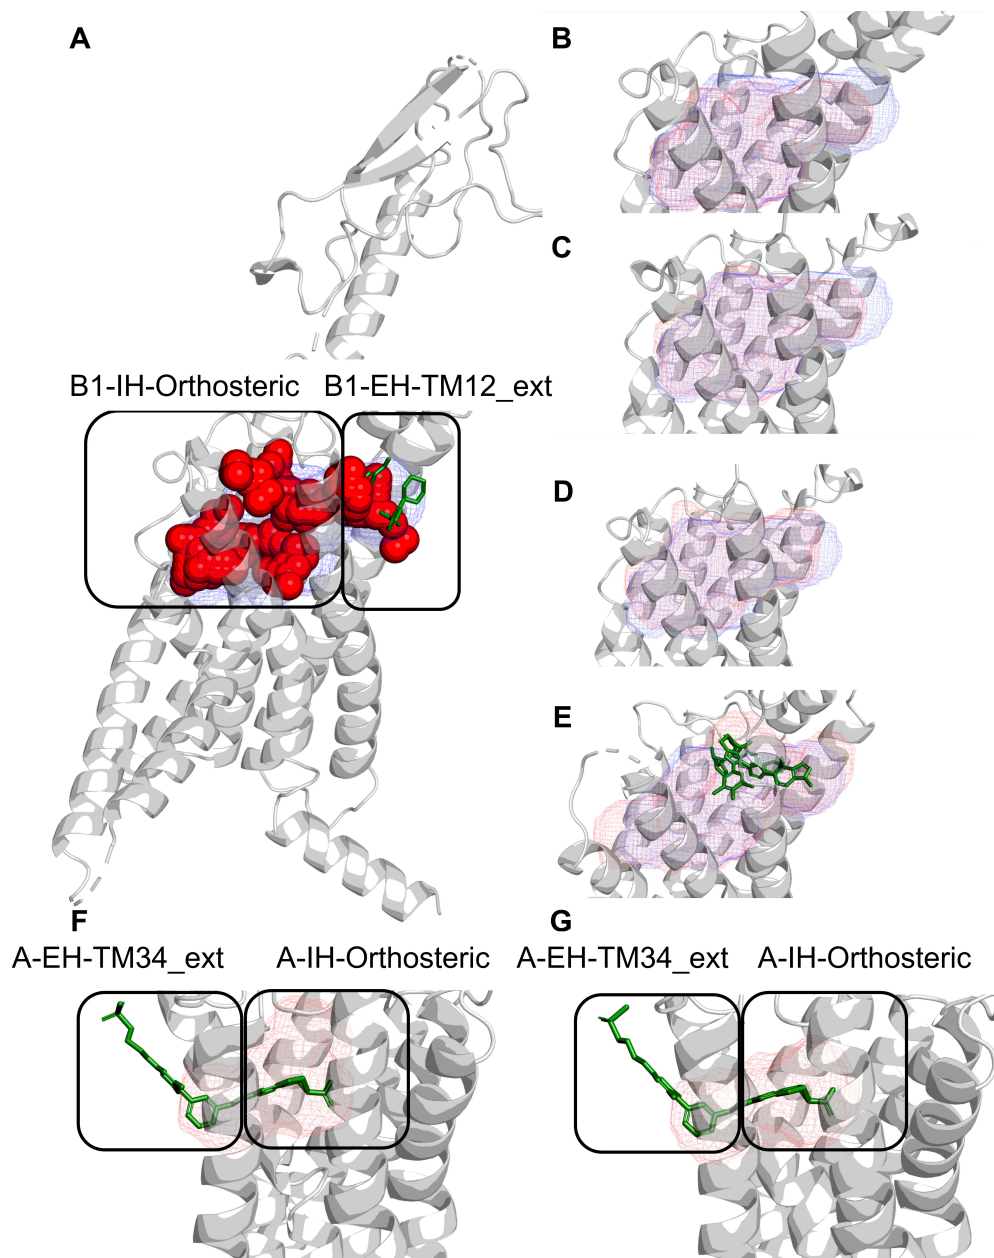

47

48 **Figure S3.** Annotation for GLP1R PAM and FFAR1 orthosteric agonist. (A) The predicted pocket for  
 49 GLP1R (PDB: 6VCB) by SiteMap is represented as red SitePoints, while BioGPS is depicted as a blue  
 50 mesh. GLP1R is shown as a gray cartoon with PAM LSN3160440 as green licorice. Both binding site  
 51 detection tools predict a site that overlaps with the PAM and extends into the B1-IH-Orthosteric site. The  
 52 ligand-based annotation would classify PAM LSN3160440 as B1-EH-TM12\_ext, while the overall pocket  
 53 would be annotated as B1-IH-Orthosteric. In the case of the PAM binding site of GLP1R, the annotation of  
 54 B1-EH-TM12\_ext\* was chosen throughout the manuscript to reflect the allosteric ligand position.  
 55 Similarly, the pocket detected in (B) active GPCRdb AlphaFold model<sup>20</sup> of (C-D) GLP1R (PDB: 6X18,  
 56 7DUQ), and (E) GLP1R (PDB: 6X19) that are shown as red mesh were annotated B1-IH-TM12\_ext\*. For  
 57 the ligand property analysis, the orthosteric agonist CHU-128 (green licorice) is annotated as B1-IH-  
 58 Orthosteric. (F, G) The predicted pockets (red mesh) for the orthosteric agonist MK-8666, depicted as green  
 59 licorice, bound to FFAR1 (gray cartoon) for PDB: 5TZY and PDB: 5TZR, respectively. The pocket  
 60 property analysis excludes the pocket volume since the MK-8666 occupies A-IH-Orthosteric and A-EH-  
 61 TM34\_ext. For the ligand property analysis, MK-8666 is annotated as A-IH-Orthosteric.

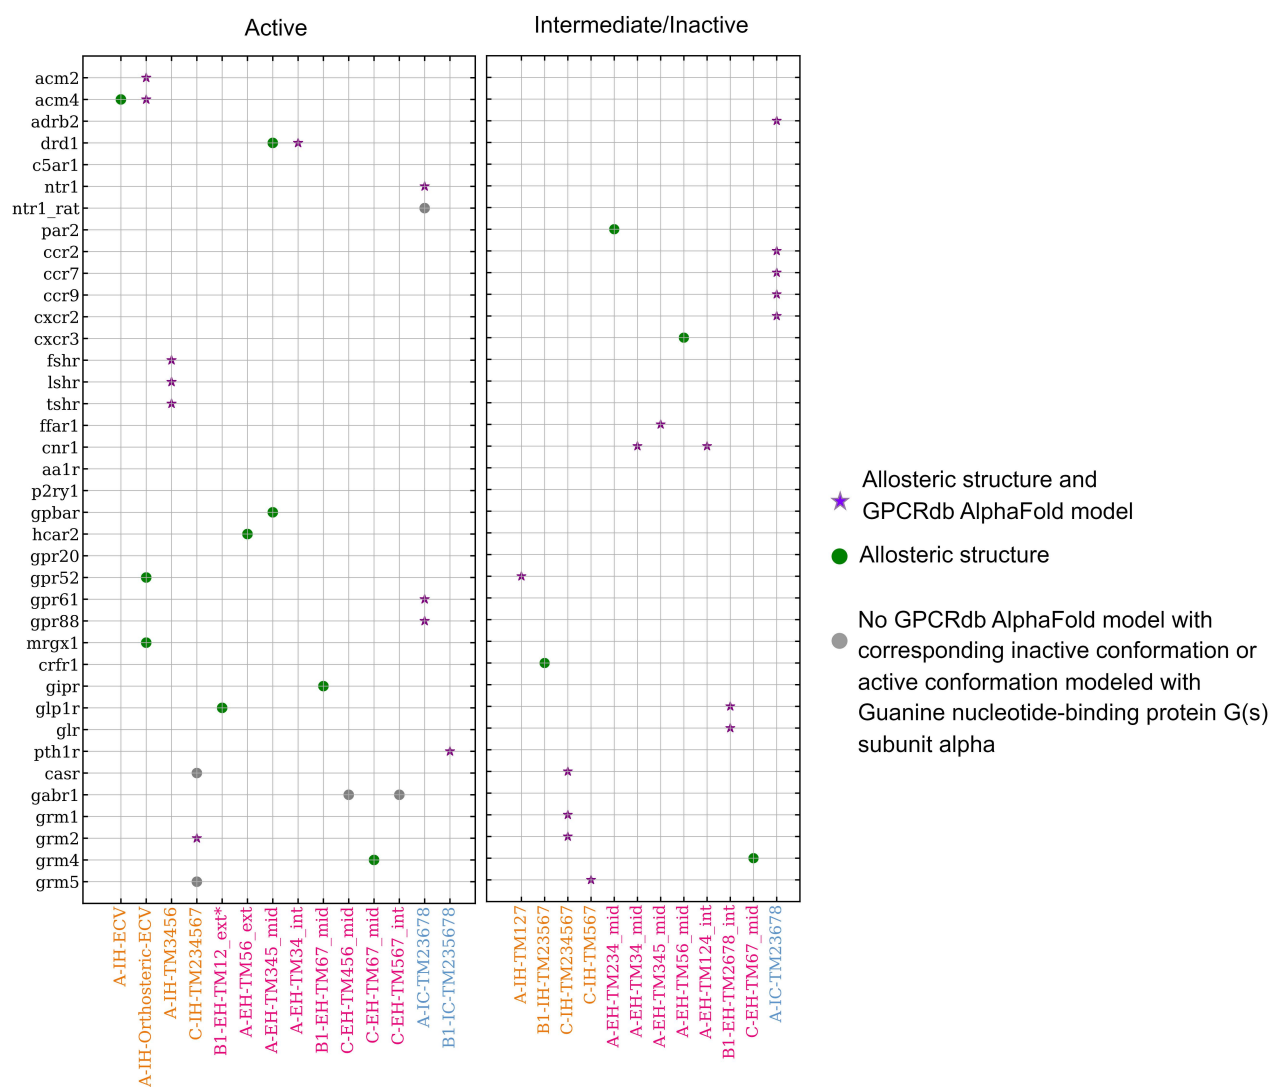

62

63 **Figure S4.** The detection of binding sites in G-protein-coupled receptors (GPCRs) depends on their  
 64 structural conformation and the allosteric site. If a binding site is detected only in the Allosteric structure,  
 65 it is represented by a green circle. If it is also found in the GPCRdb AlphaFold models<sup>20</sup>, it is represented  
 66 by a by a purple star. If no GPCRdb AlphaFold model<sup>20</sup> with the corresponding inactive conformation or  
 67 active conformation modeled with a G(s) is available, the binding site is shown as grey circle.

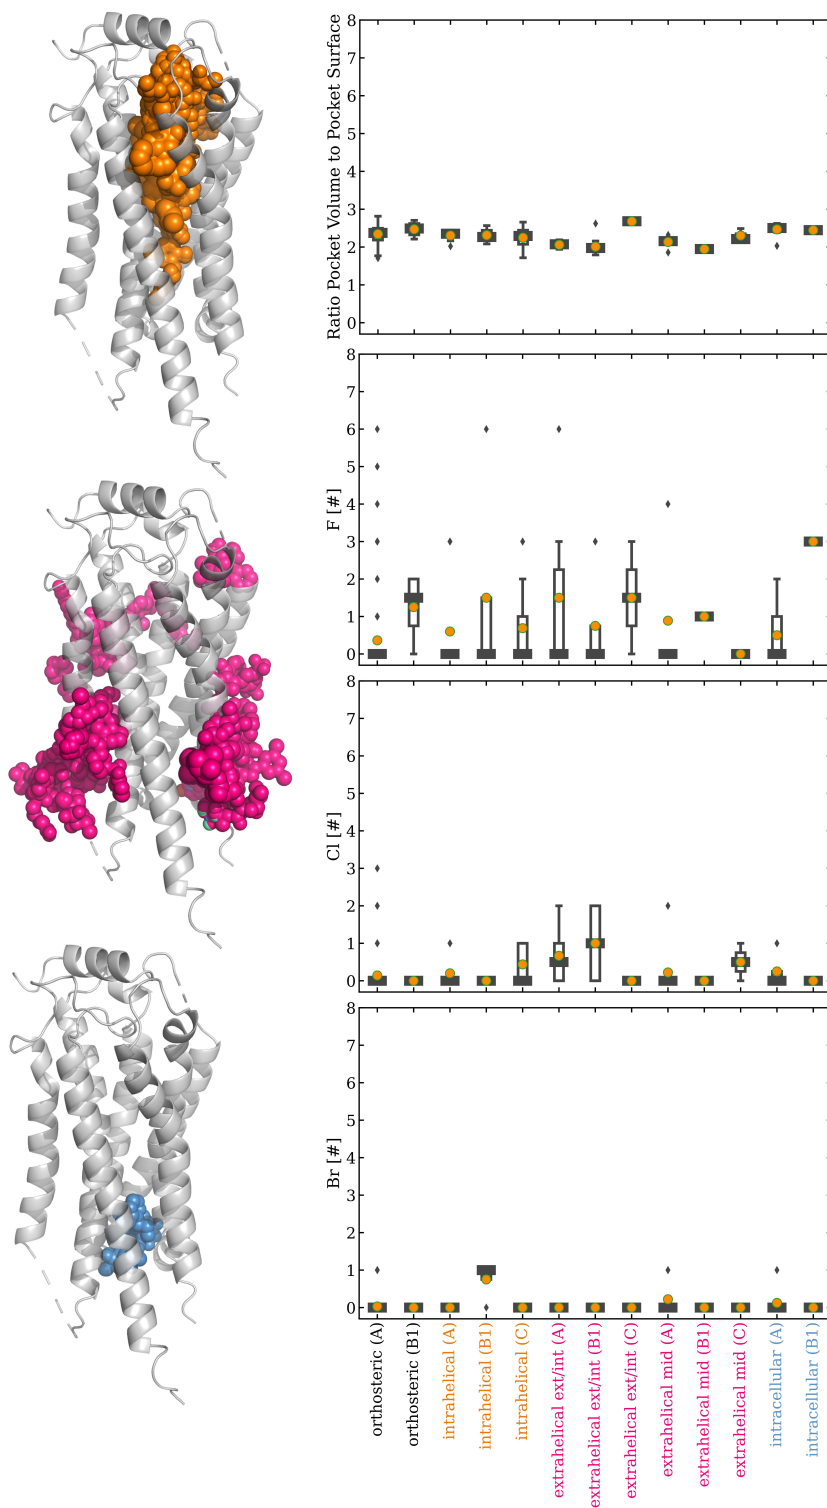

68

69 **Figure S5.** Overview of the ratios of pocket volume to pocket surface and binding site distributions of  
 70 halogens (F, Cl, and Br) for Class A, B1, and C. For halogen counts, duplicate ligands were removed. A  
 71 breakdown of the number of ligands for each binding site location is available in Supplementary Data Table  
 72 S8. For a more detailed Class-specific breakdown of descriptor values, please refer to Supplementary Data  
 73 Table S6 and Data Table S7.

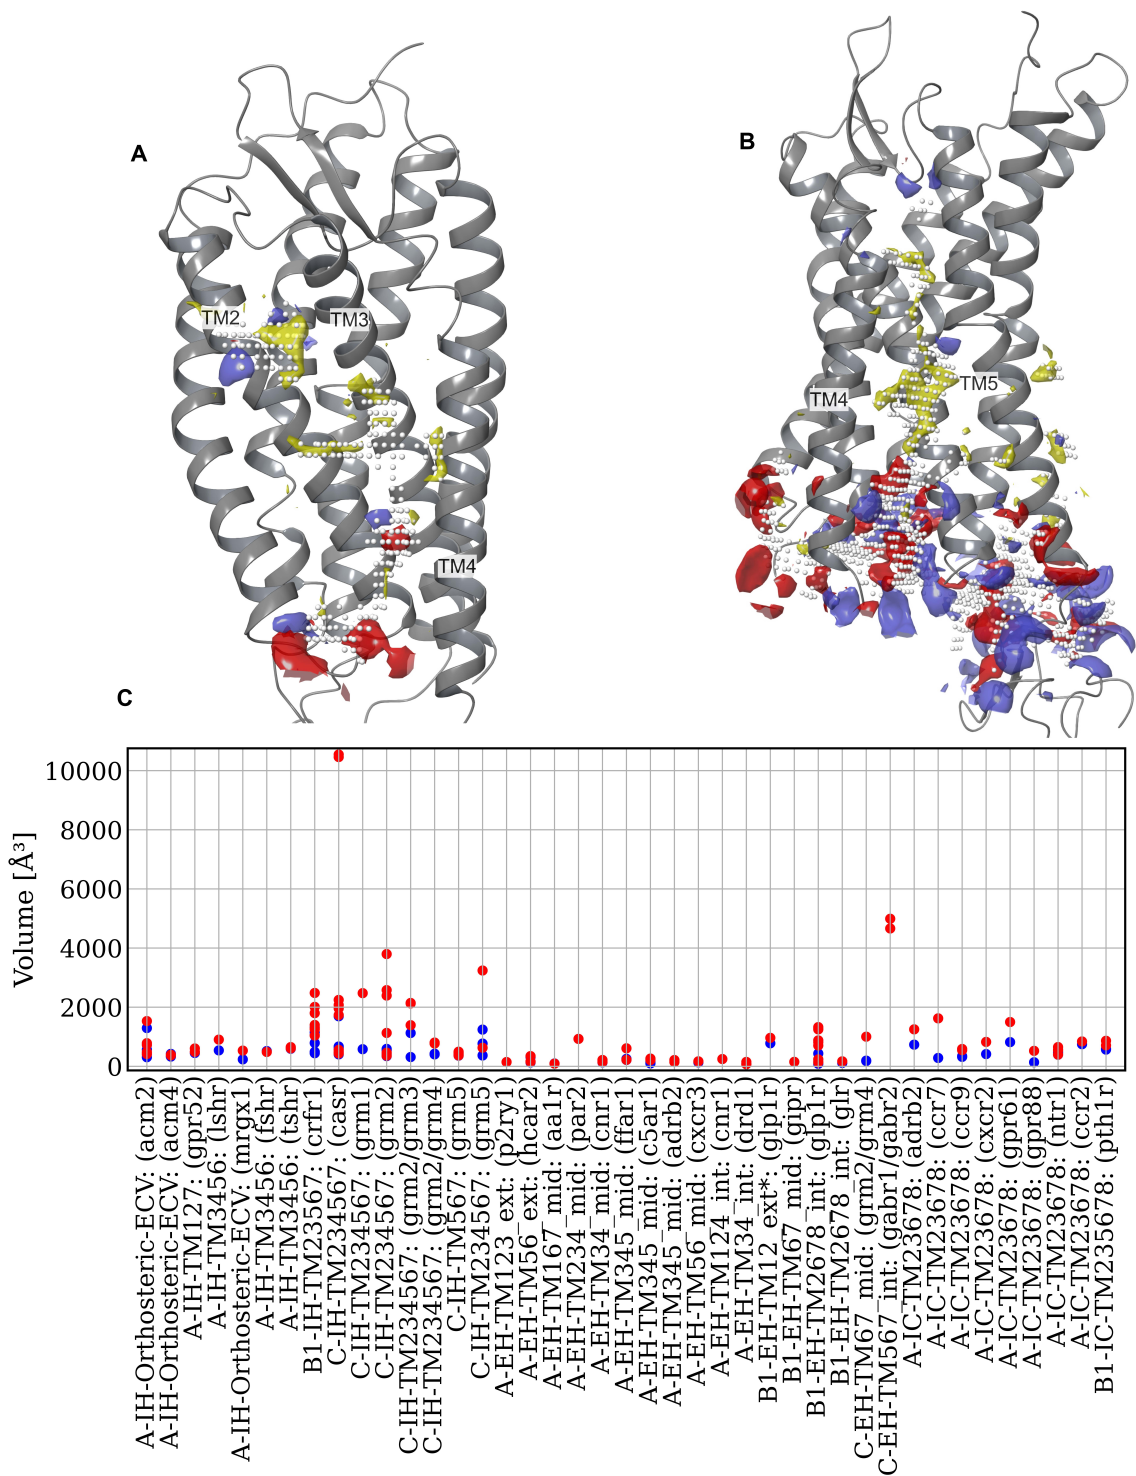

74

75 **Figure S6.** Description of two binding pockets identified by SiteMap (ppi) with default settings allowing  
 76 shallow binding site detection and comparison of the pocket volume for the same structure and binding site  
 77 between SiteMap and SiteMap (ppi). White spheres represent the pockets, and the purinergic receptor P2Y  
 78 (P2Y1R, PDB: 4XNV) is shown as a grey ribbon. (A) The first binding site, A-EH-TM123\_ext, extends to  
 79 the interior A-EH-TM124\_int site. (B) The second binding site, A-EH-TM345\_mid pocket extends into the  
 80 intracellular site. (C) Pocket volume determined by SiteMap in blue and SiteMap (ppi) in red of known  
 81 allosteric binding sites. Especially for pockets in Class C dimer, namely C-IH-TM234567 (CASR) and C-  
 82 EH-TM567\_int (GABR1/2), the pocket volume can be over 4000 Å<sup>3</sup>.



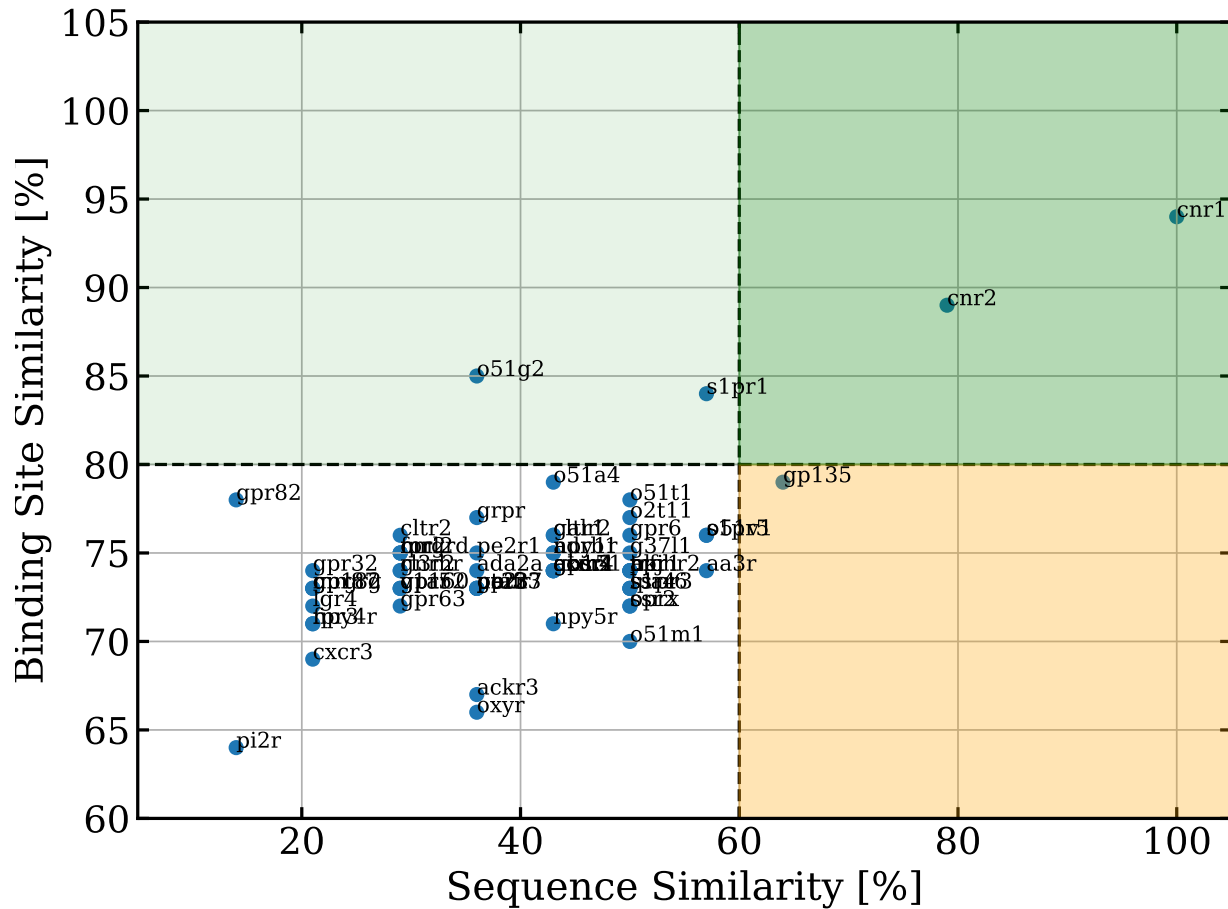

83

84 **Figure S7.** Binding Site versus Sequence similarity for A-EH-TM124\_int demonstrating that sequence and  
 85 binding site similarity correlation. A threshold of 80% was chosen to distinguish between similar binding  
 86 site and a threshold of 60% was chosen to distinguish between similar sequence. Proteins IDs that are in the  
 87 white quadrant have neither high binding site similarity, nor do they have high sequence similarity. Protein  
 88 IDs that are in the green quadrant have both high sequence and binding site similarity. Even though O51G2  
 89 has a high binding site similarity, it has a low sequence similarity. For GP135, S1PR5, and AA3R the  
 90 sequence similarity is high, but the binding site similarity compared to S1PR1 is low.

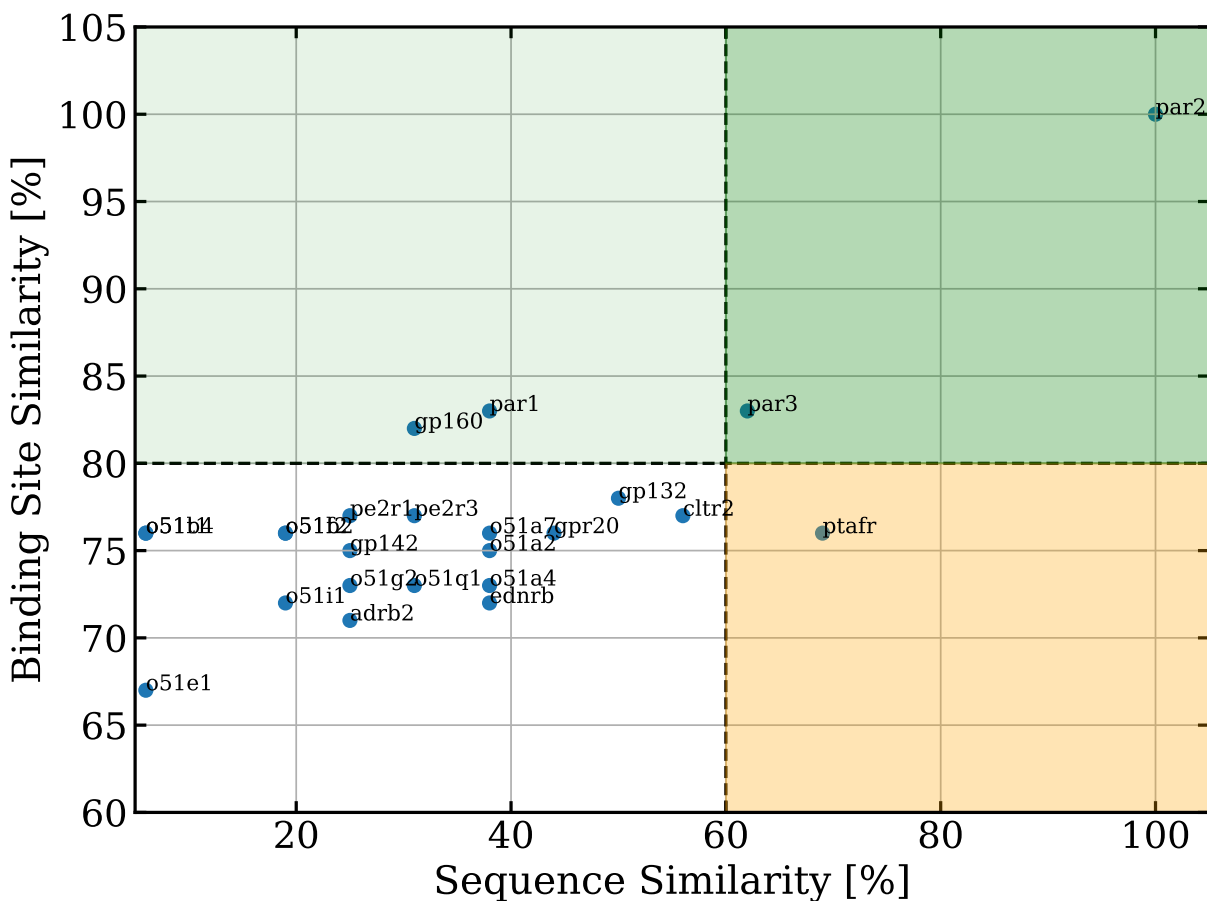

91

92 **Figure S8.** Binding Site versus Sequence similarity for A-EH-TM234\_mid demonstrating that sequence  
 93 and binding site similarity correlation. A threshold of 80% was chosen to distinguish between similar  
 94 binding site and a threshold of 60% was chosen to distinguish between similar sequence. Proteins IDs that  
 95 are in the white quadrant have neither high binding site similarity, nor do they have high sequence  
 96 similarity. Protein IDs that are in the green quadrant have both high sequence and binding site similarity.  
 97 Even though PAR1 and GP160 have a high binding site similarity, they have a low sequence similarity  
 98 (colored by light green). For PTAFR the sequence similarity is high, but the binding site similarity  
 99 compared to PAR3 is low.

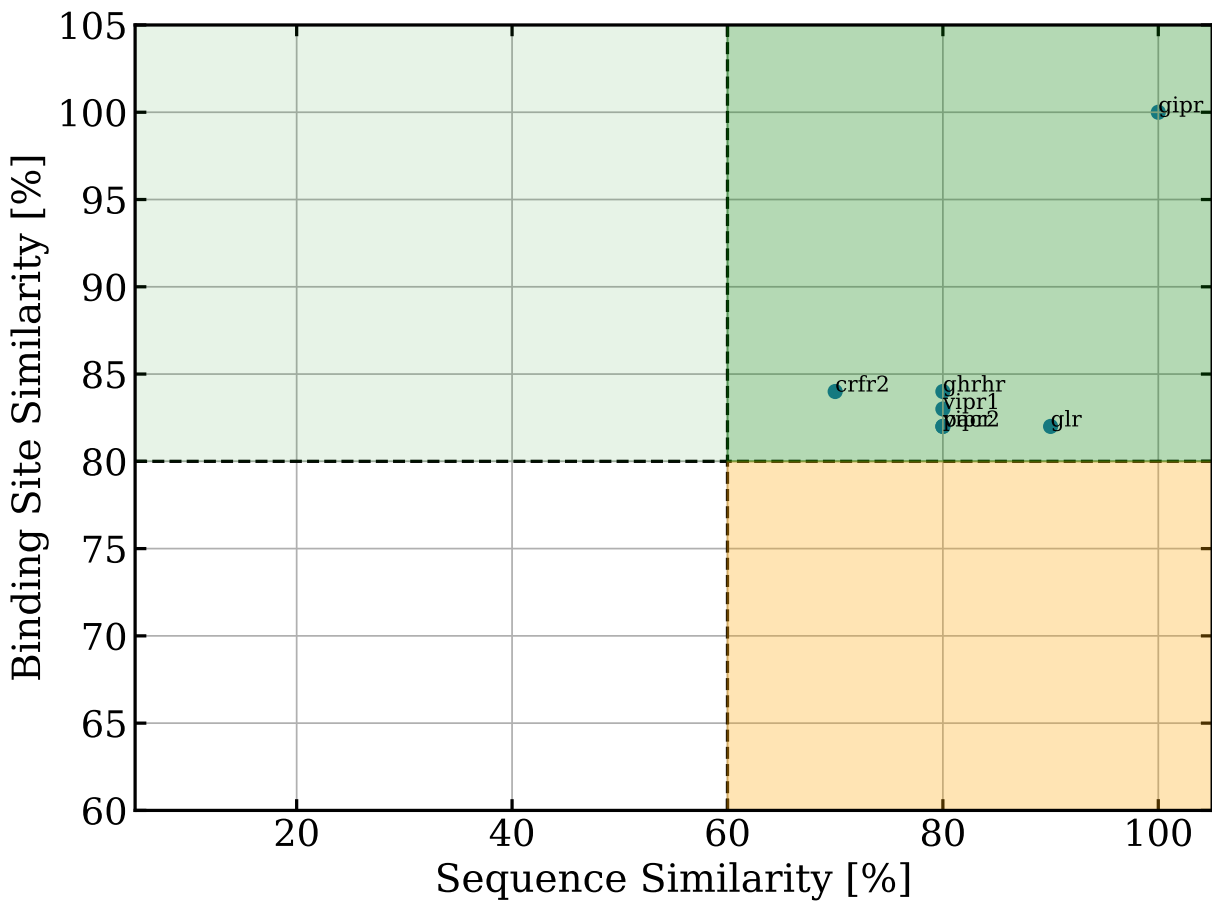

100

101 **Figure S9.** Binding Site versus Sequence similarity for B1-EH-TM67\_mid demonstrating that sequence  
 102 and binding site similarity correlation. A threshold of 80% was chosen to distinguish between similar  
 103 binding site and a threshold of 60% was chosen to distinguish between similar sequence. All protein IDs that  
 104 had a pocket at B1-EH-TM67\_mid had a high binding site and sequence similarity.

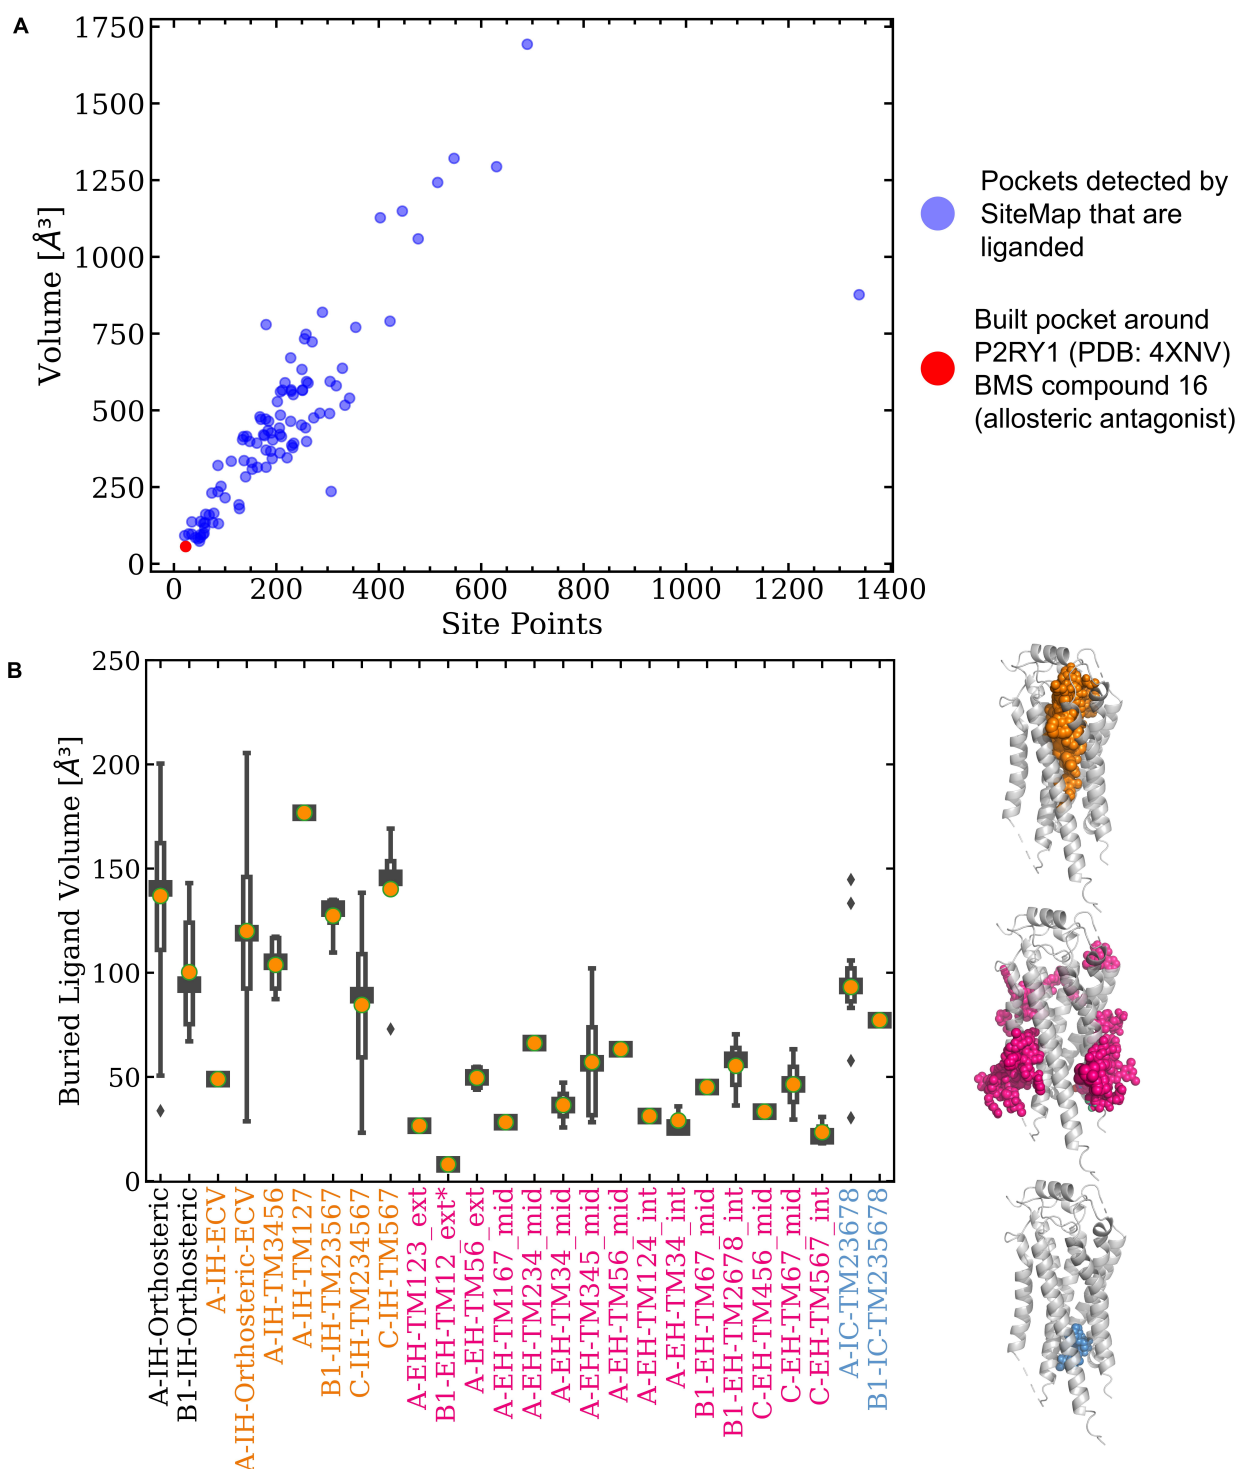

105

106 **Figure S10.** Small and shallow pocket of P2RY1 binding at A-EH-TM123\_ext. (A) Volume versus Site  
 107 Points of P2RY1 pocket build around the allosteric ligand (PDB: 4XNV) in red) and other liganded SiteMap  
 108 pockets (in blue) demonstrating the shallowness of the P2RY1 pocket. (B) Buried volumes of pockets build  
 109 around ligands binding to the orthosteric, intrahelical (IH), extrahelical (EH), and intracellular site (IC).  
 110 The buried volume of A-EH-TM123\_ext, where the NAM of P2RY1 binds is with A-EH-TM34\_mid and  
 111 A-EH-TM167\_mid with  $\sim 25 \text{\AA}^3$ .

112 **Table S2.** Overview of each allosteric ligand, indicating which other GPCR families (as per protein ID)  
 113 share similar ligands based on a threshold of 0.6 or 0.75 ligand similarity.

| Protein ID | Ligand PDB code | 0.60                                                                                                                                                                                                                                                                                                                                                                                                                                                                                                                                                                                                                                                                                                                                                                                                                                                                                                                                                                                                                                                                                                                                                                                                                                                                                                                                                                                                                                                                                                                                                                                                                                                                                                                                                                                                                                                                                                                                                                                                                                                                                                                                                                                                                                                                                                                                                                                                                                                                                                                                                                                                                                                                                                                                                                                                                                                                                                                                                                                                                                                                                                                                                                                                                                                                                  | 0.75                      |
|------------|-----------------|---------------------------------------------------------------------------------------------------------------------------------------------------------------------------------------------------------------------------------------------------------------------------------------------------------------------------------------------------------------------------------------------------------------------------------------------------------------------------------------------------------------------------------------------------------------------------------------------------------------------------------------------------------------------------------------------------------------------------------------------------------------------------------------------------------------------------------------------------------------------------------------------------------------------------------------------------------------------------------------------------------------------------------------------------------------------------------------------------------------------------------------------------------------------------------------------------------------------------------------------------------------------------------------------------------------------------------------------------------------------------------------------------------------------------------------------------------------------------------------------------------------------------------------------------------------------------------------------------------------------------------------------------------------------------------------------------------------------------------------------------------------------------------------------------------------------------------------------------------------------------------------------------------------------------------------------------------------------------------------------------------------------------------------------------------------------------------------------------------------------------------------------------------------------------------------------------------------------------------------------------------------------------------------------------------------------------------------------------------------------------------------------------------------------------------------------------------------------------------------------------------------------------------------------------------------------------------------------------------------------------------------------------------------------------------------------------------------------------------------------------------------------------------------------------------------------------------------------------------------------------------------------------------------------------------------------------------------------------------------------------------------------------------------------------------------------------------------------------------------------------------------------------------------------------------------------------------------------------------------------------------------------------------------|---------------------------|
| aa1r       | XTD             | ['ada1a', 'acm2', 'aa1r']                                                                                                                                                                                                                                                                                                                                                                                                                                                                                                                                                                                                                                                                                                                                                                                                                                                                                                                                                                                                                                                                                                                                                                                                                                                                                                                                                                                                                                                                                                                                                                                                                                                                                                                                                                                                                                                                                                                                                                                                                                                                                                                                                                                                                                                                                                                                                                                                                                                                                                                                                                                                                                                                                                                                                                                                                                                                                                                                                                                                                                                                                                                                                                                                                                                             | ['ada1a', 'acm2', 'aa1r'] |
| acm2       | 2CU             | ['grm3', 'gp146', 'ts1r2', 'ada2b', 'fzd5', 'apj', 'cckar', 'lt4r2', 't2r43', 'gpr55', 'pkr1', 'p2ry4', 'gp157', 'gpr35', 'acm4', 'gpr3', '5ht1e', 'pe2r1', 'agr14', 't2r39', 'grm8', 'mrgre', 'cltr1', '5ht6r', 'rxfp2', 'agrg5', 'lgr4', 't2r10', 'hrh1', 'nmur2', 'gpr84', 'nk1r', 'c5ar2', 'cnr2', 'ada1a', 'npff2', 's1pr5', 'ssr5', 'ur2r', 'adrb1', 'ednra', 'npbw2', 'gpr17', 'ta2r7', 'npy1r', 'mrgx1', 'ffar3', 'sucr1', 'gasr', 'mas11', 'aa2br', 'ta2r1', 'p2y10', 'tshr', 'cxcr6', 'ssr3', 's1pr3', 'c3ar', 'lpar6', '5ht5a', 'pth1r', 'ccr6', 'agrg3', 't2r16', 'taar1', 'ackr1', 'gp162', 'drd1', 'fzd8', 'o51e1', 'mchr1', 'agrl2', 'ccrl2', 'acm2', 'mtr1b', 'p2ry2', 'pi2r', 'gpr', 't2r45', 'fpr1', 'ntr2', 'par1', 'grm5', 'casr', 't2r38', 'bkrb1', 'gpr45', 'mrgrd', 'agtr1', 'gp156', '5ht1d', 'acm5', 'gpr34', 'gpc5d', 'ccr10', 't2r42', 'fzd4', 'ada2c', 'ts1r3', 'grm2', 'oprk', 'gpr25', 'gpbar', 'ffar2', 'ghrhr', 'gp174', 'npy6r', 's1pr4', 'ssr4', '5ht7r', 'ghsr', 'cxcr1', 'agrf5', 'gpr85', 'ccr1', 'glp1r', 'v2r', 'v1br', 't2r60', 'lpar1', 'taar6', 'lgr5', 'gabr2', 'aa1r', '5ht2a', 'cml2', 'galr1', 'ta2r', 'lshr', 'gpr83', 'ccr7', 'gp119', 'kissr', 'gpr88', 'ox1r', 'ssr2', 's1pr2', 'agra2', 'gpr61', 'ffar4', 'rl3r2', 'gpc6a', 'p2y11', 'oprm', 'pd2r2', 'fzd2', 'gp141', 'grm4', 'gpr52', 'p2ry8', 'agrb1', 'xcr1', 'gpr39', 'opsg', '5ht1b', 'gpr4', 'acm3', 'hear1', 'gpr32', 'gp150', 'crfr1', 'vipr2', 'fzd9', 'prlhr', 'bai1', 'sctr', 'agrl3', 'qrfpr', 'cxcr2', 'gpr15', 'ccr9', 'adrb3', 'pacr', 'ffar1', 'mrgx3', 'opn3', 'p2y14', 't2r19', 'ta2r5', 'taar5', 'lgr6', 'gnrhr', 'drd5', 'brs3', 'lpar2', 'gpr75', 'hrh3', 'ccr2', 'trfr', 'gpr1', 'gpr37', 'agtr2', 'mrgrg', 't2r50', 'v1ar', 'glp2r', 'bkrb2', 'ogr1', 't2r30', 'gpr26', '5ht4r', 'fzd7', 'npy5r', 'rai3', 'grm1', 'nk3r', 't2r41', 'fshr', 'gp135', 'fzd10', 'oxer1', 'or1gl', 'fpr3', 'opsd', 'gipr', 'agrb2', 'fzd1', 'ox2r', 'gp142', 'grm7', 'par3', 'gpr20', 'vipr1', 'or1a1', 'gp153', 'crfr2', 'ptafr', '5ht1a', 'pd2r', 'gpr31', 'npsr1', 'hear2', 'mc5r', 'acthr', 'ccr4', 'gpr18', 'lpar4', 'etbr2', 'drd3', 'cml1', 'galr2', 'ackr3', 't2r14', 'gabr1', 'taar3', 'ta2r8', '5ht2b', 'agrg1', 'opr', 'p2y12', 'opn5', 'taar8', 'ta2r3', 'agra1', 'gpr62', 'rl3r1', 'gp171', 'gpr78', 's1pr1', 'ssr1', 'mc3r', 'cxcr4', 'opsr', 'gp182', 'lpar3', 'calr1', 'c5ar1', 'cnr1', 'gper1', 'hrh2', 'nmur1', 'ccr3', 'gpr87', 't2r13', 'ackr4', 'rxfp1', 'drd4', 'mrgx2', 'ta2r4', 'g3711', 'ccr8', 'ednrb', 'npbw1', 'cxcr3', 'mshr', 'npff1', 'ada1b', 'gp176', 'adrb2', 'glr', 'mtr11', 't2r40', 'pkr2', 'npy2r', 'lt4r1', 'gpr27', 't2r31', 'par4', 'psyr', 'ts1r1', 'fzd6', 'ada2a', 'pf2r', 'nk2r', 'cltr2', 'mrgrf', 'pe2r2', 't2r20', '5ht1f', 'npy4r', 'p2ry1', 'mtr1a', 'gp152', 'hear3', 'gp139', 'gpr6', 'o51e2', 'opr', 'mchr2', 'pe2r4', 'oxyr', 'agrl1', 'pth2r', 'gp148', 'gp143', 'grm6', 'oxgr1', 'ntr1', 'aa3r', 'calcr', 'mtr', 'gpr21', 'par2', 'fpr2', 'gp132', 'aa2ar', 'agrb3', 't2r46', 'smo', 'ada1d', 'gp183', 'agrf1', 'gpr12', 'cxcr5', 'gp101', 'p2y13', 'opn4', 'taar9', 'mc4r', 'mrgx4', 'gpr63', 'ackr2', 'mas', 'galr3', 'gp161', 'drd2', 'cx3c1', '5ht2c', 'ta2r9', 'nmbr', 'taar2', 'gpr19', 'ccr5', 'hrh4', 'lpar5'] | []                        |

|       |     |                                                                                                                                                                                                                                                                                                                                                                                                                                                                                                                                                                                                                                                                                                                                                                                                                                                                                                                                                                                                                                                                                                                                                                                                                                                                                                                                                                                                                                                                                                                                                                                                                                                                                                                                                                                                                                                                                                                                                                                                                                                                                                                                                                                                                                                                                                                                                                                                                                                                                                                                                                                                                                                                                                                                                                                                                                                                                                                                                                                                                                                                                                                                                                                                                                                                                         |                                  |
|-------|-----|-----------------------------------------------------------------------------------------------------------------------------------------------------------------------------------------------------------------------------------------------------------------------------------------------------------------------------------------------------------------------------------------------------------------------------------------------------------------------------------------------------------------------------------------------------------------------------------------------------------------------------------------------------------------------------------------------------------------------------------------------------------------------------------------------------------------------------------------------------------------------------------------------------------------------------------------------------------------------------------------------------------------------------------------------------------------------------------------------------------------------------------------------------------------------------------------------------------------------------------------------------------------------------------------------------------------------------------------------------------------------------------------------------------------------------------------------------------------------------------------------------------------------------------------------------------------------------------------------------------------------------------------------------------------------------------------------------------------------------------------------------------------------------------------------------------------------------------------------------------------------------------------------------------------------------------------------------------------------------------------------------------------------------------------------------------------------------------------------------------------------------------------------------------------------------------------------------------------------------------------------------------------------------------------------------------------------------------------------------------------------------------------------------------------------------------------------------------------------------------------------------------------------------------------------------------------------------------------------------------------------------------------------------------------------------------------------------------------------------------------------------------------------------------------------------------------------------------------------------------------------------------------------------------------------------------------------------------------------------------------------------------------------------------------------------------------------------------------------------------------------------------------------------------------------------------------------------------------------------------------------------------------------------------------|----------------------------------|
| acm4  | IUE | ['grm3', 'gp146', 'ts1r2', 'ada2b', 'fzd5', 'apj', 'cckar', 'lt4r2', 't2r43', 'gpr55', 'pkr1', 'p2ry4', 'gp157', 'gpr35', 'acm4', 'gpr3', '5ht1e', 'pe2r1', 'agrl4', 't2r39', 'grm8', 'mrgre', 'cltr1', '5ht6r', 'rxfp2', 'agrg5', 'lgr4', 't2r10', 'hrhl', 'nmur2', 'gpr84', 'nk1r', 'c5ar2', 'cnr2', 'ada1a', 'npff2', 's1pr5', 'ssr5', 'ur2r', 'adrb1', 'ednra', 'npbw2', 'gpr17', 'ta2r7', 'npy1r', 'mrgx1', 'ffar3', 'sucr1', 'gasr', 'mas1l', 'aa2br', 'ta2r1', 'p2y10', 'tshr', 'cxcr6', 'ssr3', 's1pr3', 'c3ar', 'lpar6', '5ht5a', 'pth1r', 'ccr6', 'agrg3', 't2r16', 'taar1', 'ackr1', 'gp162', 'drd1', 'fzd8', 'o51e1', 'mchr1', 'agrl2', 'ccr12', 'acm2', 'mtr1b', 'p2ry2', 'pi2r', 'grpr', 't2r45', 'fpr1', 'ntr2', 'par1', 'grm5', 'casr', 't2r38', 'bkrb1', 'gpr45', 'mrgrd', 'agtr1', 'gp156', '5ht1d', 'acm5', 'gpr34', 'gpc5d', 'ccr10', 't2r42', 'fzd4', 'ada2c', 'ts1r3', 'grm2', 'oprk', 'gpr25', 'gpbar', 'ffar2', 'ghrhr', 'gp174', 'npy6r', 's1pr4', 'ssr4', '5ht7r', 'ghsr', 'cxcr1', 'agrf5', 'gpr85', 'ccr1', 'glp1r', 'v2r', 'v1br', 't2r60', 'lpar1', 'taar6', 'lgr5', 'gabr2', 'aalr', '5ht2a', 'cml2', 'galr1', 'ta2r', 'lshr', 'gpr83', 'ccr7', 'gp119', 'kissr', 'gpr88', 'ox1r', 'ssr2', 's1pr2', 'agra2', 'gpr61', 'ffar4', 'rl3r2', 'gpc6a', 'p2y11', 'oprm', 'pd2r2', 'fzd2', 'gp141', 'grm4', 'gpr52', 'p2ry8', 'agrb1', 'xcr1', 'gpr39', 'opsg', '5ht1b', 'gpr4', 'acm3', 'hcar1', 'gpr32', 'gp150', 'crfr1', 'vipr2', 'fzd9', 'prlhr', 'bail', 'sctr', 'agrl3', 'qrfpr', 'cxcr2', 'gpr15', 'ccr9', 'adrb3', 'pacr', 'ffar1', 'mrgx3', 'opn3', 'p2y14', 't2r19', 'ta2r5', 'taar5', 'lgr6', 'gnrhr', 'drd5', 'brs3', 'lpar2', 'gpr75', 'hrh3', 'ccr2', 'trfr', 'gpr1', 'gpr37', 'agtr2', 'mrgrg', 't2r50', 'vlar', 'glp2r', 'bkrb2', 'ogr1', 't2r30', 'gpr26', '5ht4r', 'fzd7', 'npy5r', 'rai3', 'grm1', 'nk3r', 't2r41', 'fshr', 'gp135', 'fzd10', 'oxer1', 'or1gl', 'fpr3', 'opsd', 'gipr', 'agrb2', 'fzd1', 'ox2r', 'gp142', 'grm7', 'par3', 'gpr20', 'vipr1', 'or1al', 'gp153', 'crfr2', 'ptafr', '5ht1a', 'pd2r', 'gpr31', 'npsr1', 'hcar2', 'mc5r', 'acthr', 'ccr4', 'gpr18', 'lpar4', 'etbr2', 'drd3', 'cml1', 'galr2', 'ackr3', 't2r14', 'gabr1', 'taar3', 'ta2r8', '5ht2b', 'agrg1', 'opr', 'p2y12', 'opn5', 'taar8', 'ta2r3', 'agra1', 'gpr62', 'rl3r1', 'gp171', 'gpr78', 's1pr1', 'ssr1', 'mc3r', 'cxcr4', 'opsr', 'gp182', 'lpar3', 'calr1', 'c5ar1', 'cnr1', 'gper1', 'hrh2', 'nmur1', 'ccr3', 'gpr87', 't2r13', 'ackr4', 'rxfp1', 'drd4', 'mrgx2', 'ta2r4', 'g3711', 'ccr8', 'ednrb', 'npbw1', 'cxcr3', 'mshr', 'npff1', 'ada1b', 'gp176', 'adrb2', 'glr', 'mtr11', 't2r40', 'pkr2', 'npy2r', 'lt4r1', 'gpr27', 't2r31', 'par4', 'psyr', 'ts1r1', 'fzd6', 'ada2a', 'pf2r', 'nk2r', 'cltr2', 'mrgrf', 'pe2r2', 't2r20', '5ht1f', 'npy4r', 'p2ry1', 'mtr1a', 'gp152', 'hcar3', 'gp139', 'gpr6', 'o51e2', 'oprd', 'mchr2', 'pe2r4', 'oxyr', 'agrl1', 'pth2r', 'gp148', 'gp143', 'grm6', 'oxgr1', 'ntr1', 'aa3r', 'calcr', 'mtr1', 'gpr21', 'par2', 'fpr2', 'gp132', 'aa2ar', 'agrb3', 't2r46', 'smo', 'ada1d', 'gp183', 'agrf1', 'gpr12', 'cxcr5', 'gp101', 'p2y13', 'opn4', 'taar9', 'mc4r', 'mrgx4', 'gpr63', 'ackr2', 'mas', 'galr3', 'gp161', 'drd2', 'cx3c1', '5ht2c', 'ta2r9', 'nmb', 'taar2', 'gpr19', 'ccr5', 'hrh4', 'lpar5'] | ['acm4', 'acm2']                 |
| acm4  | IUI | ['acm4', 'acm2', 'acm5', 'ghsr', 'acm3']                                                                                                                                                                                                                                                                                                                                                                                                                                                                                                                                                                                                                                                                                                                                                                                                                                                                                                                                                                                                                                                                                                                                                                                                                                                                                                                                                                                                                                                                                                                                                                                                                                                                                                                                                                                                                                                                                                                                                                                                                                                                                                                                                                                                                                                                                                                                                                                                                                                                                                                                                                                                                                                                                                                                                                                                                                                                                                                                                                                                                                                                                                                                                                                                                                                | ['acm4']                         |
| acm4  | XNO | ['acm4', 'acm2', 'acm5', 'acm3']                                                                                                                                                                                                                                                                                                                                                                                                                                                                                                                                                                                                                                                                                                                                                                                                                                                                                                                                                                                                                                                                                                                                                                                                                                                                                                                                                                                                                                                                                                                                                                                                                                                                                                                                                                                                                                                                                                                                                                                                                                                                                                                                                                                                                                                                                                                                                                                                                                                                                                                                                                                                                                                                                                                                                                                                                                                                                                                                                                                                                                                                                                                                                                                                                                                        | ['acm4', 'acm2', 'acm5', 'acm3'] |
| adrb2 | 8VS | ['adrb1', 'v2r', 'adrb2']                                                                                                                                                                                                                                                                                                                                                                                                                                                                                                                                                                                                                                                                                                                                                                                                                                                                                                                                                                                                                                                                                                                                                                                                                                                                                                                                                                                                                                                                                                                                                                                                                                                                                                                                                                                                                                                                                                                                                                                                                                                                                                                                                                                                                                                                                                                                                                                                                                                                                                                                                                                                                                                                                                                                                                                                                                                                                                                                                                                                                                                                                                                                                                                                                                                               | ['adrb1', 'v2r', 'adrb2']        |
| adrb2 | KBY | ['adrb1', 'v2r', 'adrb2']                                                                                                                                                                                                                                                                                                                                                                                                                                                                                                                                                                                                                                                                                                                                                                                                                                                                                                                                                                                                                                                                                                                                                                                                                                                                                                                                                                                                                                                                                                                                                                                                                                                                                                                                                                                                                                                                                                                                                                                                                                                                                                                                                                                                                                                                                                                                                                                                                                                                                                                                                                                                                                                                                                                                                                                                                                                                                                                                                                                                                                                                                                                                                                                                                                                               | ['adrb1', 'v2r', 'adrb2']        |

|       |     |                                   |                                   |
|-------|-----|-----------------------------------|-----------------------------------|
| adrb2 | M3J | ['taar1', 'adrb2']                | []                                |
| c5ar1 | 9P2 | ['c5ar1']                         | ['c5ar1']                         |
| c5ar1 | EFD | ['c5ar1']                         | ['c5ar1']                         |
| casr  | H43 | ['casr']                          | ['casr']                          |
| casr  | YP1 | ['casr', 'adrb2']                 | ['casr']                          |
| casr  | 9IG | ['casr']                          | ['casr']                          |
| casr  | YP4 | ['casr']                          | ['casr']                          |
| ccr2  | VT5 | ['ccr1', 'ccr2']                  | ['ccr1', 'ccr2']                  |
| ccr7  | JLW | ['excr1', 'ccr7', 'excr2']        | ['excr1', 'ccr7', 'excr2']        |
| ccr9  | 79K | ['ccr9', 'ccr2']                  | ['ccr9']                          |
| cnr1  | 9GL | ['cnr2', 'cnr1']                  | ['cnr2', 'cnr1']                  |
| cnr1  | 7IC | ['npsr1', 'cnr1']                 | ['cnr1']                          |
| crfr1 | 1Q5 | ['crfr1']                         | ['crfr1']                         |
| excr2 | EBX | ['excr1', 'excr2', 'excr3']       | []                                |
| excr3 | 43I | ['excr1', 'excr3']                | ['excr3']                         |
| drd1  | G4C | ['drd1', '5ht2b']                 | ['drd1']                          |
| ffar1 | 6XQ | ['ffar1']                         | []                                |
| ffar1 | 7OS | ['ffar1']                         | ['ffar1']                         |
| fshr  | O6F | ['fshr']                          | []                                |
| gabr1 | QDA | []                                | []                                |
| gabr1 | FN0 | ['cckar', 'gabr2', 'gabr1']       | ['cckar', 'gabr2', 'gabr1']       |
| gipr  | 41Y | ['gipr']                          | ['gipr']                          |
| glp1r | 97Y | ['glr']                           | []                                |
| glp1r | QW7 | []                                | []                                |
| glp1r | HNO | ['glp1r']                         | ['glp1r']                         |
| glr   | 5MV | ['glp1r', 'vipr2', 'gipr', 'glr'] | ['glp1r', 'vipr2', 'gipr', 'glr'] |
| glr   | 97V | []                                | []                                |
| gpbar | FX0 | ['gpbar']                         | ['gpbar']                         |
| gpr52 | EN6 | ['gpr52']                         | ['gpr52']                         |
| gpr88 | J5F | ['oprk', 'gpr88']                 | ['gpr88']                         |
| grm1  | FM9 | ['grm5', '5ht2a', 'grm1']         | ['grm5', '5ht2a', 'grm1']         |
| grm2  | HZR | ['grm2']                          | ['grm2']                          |
| grm2  | J9R | ['grm2']                          | ['grm2']                          |
| grm2  | J9U | []                                | []                                |
| grm2  | ZQY | []                                | []                                |
| grm4  | BQI | ['grm4']                          | ['grm4']                          |
| grm4  | BK0 | ['grm5', 'grm4']                  | []                                |
| grm5  | 2U8 | ['grm5']                          | ['grm5']                          |
| grm5  | 51D | ['grm5']                          | []                                |

|       |          |                                              |                                   |
|-------|----------|----------------------------------------------|-----------------------------------|
| grm5  | 51E      | ['grm5']                                     | ['grm5']                          |
| grm5  | D7W      | ['grm5']                                     | ['grm5']                          |
| grm5  | D8B      | ['grm5', 'grm4', 'grm1']                     | ['grm5']                          |
| grm5  | 4YI      | ['grm5', 'grm4']                             | []                                |
| grm5  | YKU      | ['grm5']                                     | ['grm5']                          |
| hcar2 | IX8      | ['hcar2']                                    | ['hcar2']                         |
| lshr  | 55Z      | ['tshr', 'lshr', 'gnrhr', 'fshr']            | ['lshr', 'fshr']                  |
| mrgx1 | U39      | ['hrh1', 'mrgx1']                            | ['hrh1',<br>'mrgx1']              |
| nr1   | SRW      | ['nr1']                                      | ['nr1']                           |
| p2ry1 | BUR      | ['p2ry2', '5ht2a', 'p2y14', 'p2ry1', 'drd2'] | ['p2ry2',<br>'p2y14',<br>'p2ry1'] |
| par2  | 8UN      | []                                           | []                                |
| par2  | Antibody | ['crfr1']                                    | []                                |
| tshr  | HOI      | ['tshr', 'opr']                              | ['tshr']                          |



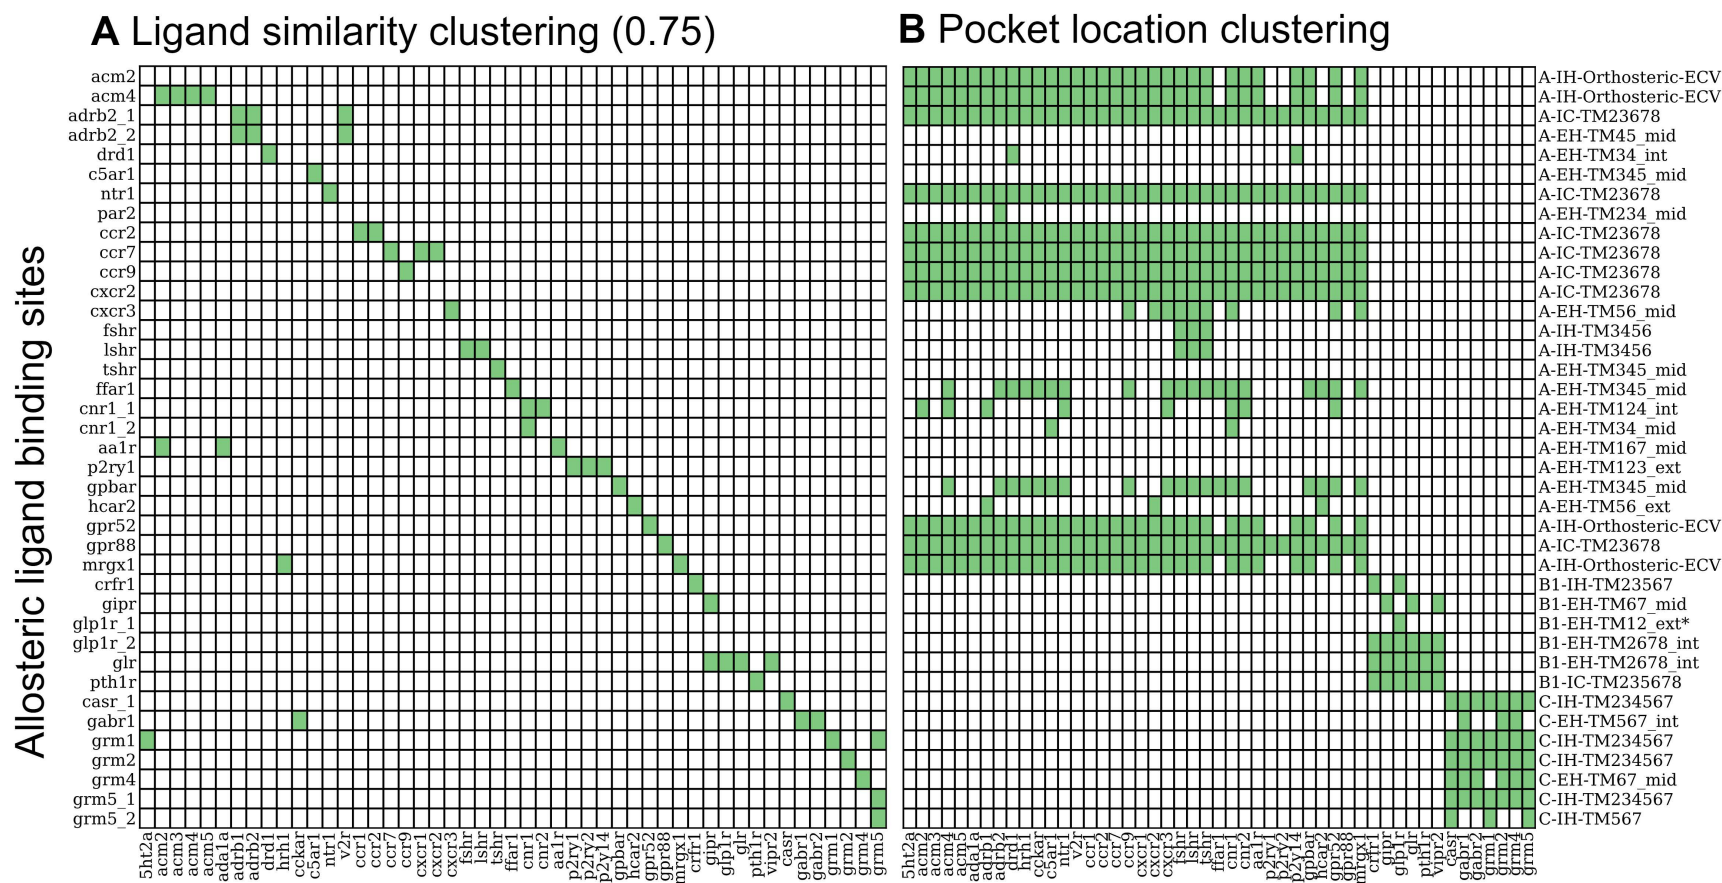

**Figure S11.** Ligandability analysis using ligand-based and pocket-based approaches (y-axis) and GPCR families that have at least one similar bioactive compound to one of the allosteric small molecule references (x-axis). (A) The heatmap indicates the identification of similar bioactive compounds ( $pX \geq 5$  for each GPCR listed on the X-axis) to the bound allosteric ligand on the Y-axis shown by the bound GPCR name (similarity  $\geq 0.75$ ). Green: found; white: no similar bioactive compounds other than to itself. Please refer to Table S2 for detailed table regarding similar compounds to allosteric ligands found for a threshold of a Tanimoto score 0.60 and 0.75. (B) The heatmap shows if a pocket is detected (in green) for the GPCRs either with known bound allosteric ligands or having similar active compounds as the allosteric GPCR ligand. Sites that were not detected by BioGPS (geo) are colored in white.

## 1 References

- 2 (1) Hauser, A. S.; Attwood, M. M.; Rask-Andersen, M.; Schiöth, H. B.; Gloriam, D. E. Trends in  
3 GPCR Drug Discovery: New Agents, Targets and Indications. *Nat Rev Drug Discov* **2017**, *16* (12),  
4 829–842. <https://doi.org/10.1038/nrd.2017.178>.
- 5 (2) Congreve, M.; Graaf, C. de; Swain, N. A.; Tate, C. G. Impact of GPCR Structures on Drug  
6 Discovery. *Cell* **2020**, *181* (1), 81–91. <https://doi.org/10.1016/j.cell.2020.03.003>.
- 7 (3) Graaf, C. de; Song, G.; Cao, C.; Zhao, Q.; Wang, M.-W.; Wu, B.; Stevens, R. C. Extending  
8 the Structural View of Class B GPCRs. *Trends Biochem Sci* **2017**, *42* (12), 946–960.  
9 <https://doi.org/10.1016/j.tibs.2017.10.003>.
- 10 (4) Congreve, M.; Oswald, C.; Marshall, F. H. Applying Structure-Based Drug Design  
11 Approaches to Allosteric Modulators of GPCRs. *Trends Pharmacol Sci* **2017**, *38* (9), 837–847.  
12 <https://doi.org/10.1016/j.tips.2017.05.010>.
- 13 (5) Hedderich, J. B.; Persechino, M.; Becker, K.; Heydenreich, F. M.; Gutermuth, T.; Bouvier,  
14 M.; Bünemann, M.; Kolb, P. The Pocketome of G-Protein-Coupled Receptors Reveals  
15 Previously Untargeted Allosteric Sites. *Nat Commun* **2022**, *13* (1), 2567.  
16 <https://doi.org/10.1038/s41467-022-29609-6>.
- 17 (6) Kooistra, A. J.; Munk, C.; Hauser, A. S.; Gloriam, D. E. An Online GPCR Structure Analysis  
18 Platform. *Nat. Struct. Mol. Biol.* **2021**, *28* (11), 875–878. [https://doi.org/10.1038/s41594-021-](https://doi.org/10.1038/s41594-021-00675-6)  
19 [00675-6](https://doi.org/10.1038/s41594-021-00675-6).
- 20 (7) Kooistra, A. J.; Mordalski, S.; Pándy-Szekeres, G.; Esguerra, M.; Mamyrbekov, A.; Munk,  
21 C.; Keserű, G. M.; Gloriam, D. E. GPCRdb in 2021: Integrating GPCR Sequence, Structure and  
22 Function. *Nucleic Acids Res.* **2020**, *49* (D1), gkaa1080-. <https://doi.org/10.1093/nar/gkaa1080>.
- 23 (8) Desaphy, J.; Bret, G.; Rognan, D.; Kellenberger, E. Sc-PDB: A 3D-Database of Ligandable  
24 Binding Sites—10 Years On. *Nucleic Acids Res.* **2015**, *43* (D1), D399–D404.  
25 <https://doi.org/10.1093/nar/gku928>.
- 26 (9) Stank, A.; Kokh, D. B.; Fuller, J. C.; Wade, R. C. Protein Binding Pocket Dynamics. *Acc.*  
27 *Chem. Res.* **2016**, *49* (5), 809–815. <https://doi.org/10.1021/acs.accounts.5b00516>.
- 28 (10) Ballante, F.; Kooistra, A. J.; Kampen, S.; Graaf, C. de; Carlsson, J. Structure-Based Virtual  
29 Screening for Ligands of G Protein–Coupled Receptors: What Can Molecular Docking Do for  
30 You? *Pharmacol. Rev.* **2021**, *73* (4), 527–565. <https://doi.org/10.1124/pharmrev.120.000246>.
- 31 (11) Wakefield, A. E.; Bajusz, D.; Kozakov, D.; Keserű, G. M.; Vajda, S. Conservation of  
32 Allosteric Ligand Binding Sites in G-Protein Coupled Receptors. *J Chem Inf Model* **2022**, *62*  
33 (20), 4937–4954. <https://doi.org/10.1021/acs.jcim.2c00209>.

- 34 (12) Brenke, R.; Kozakov, D.; Chuang, G.-Y.; Beglov, D.; Hall, D.; Landon, M. R.; Mattos, C.;  
35 Vajda, S. Fragment-Based Identification of Druggable ‘Hot Spots’ of Proteins Using Fourier  
36 Domain Correlation Techniques. *Bioinformatics* **2009**, *25* (5), 621–627.  
37 <https://doi.org/10.1093/bioinformatics/btp036>.
- 38 (13) Baroni, M.; Cruciani, G.; Sciabola, S.; Perruccio, F.; Mason, J. S. A Common Reference  
39 Framework for Analyzing/Comparing Proteins and Ligands. Fingerprints for Ligands And  
40 Proteins (FLAP): Theory and Application. *J Chem Inf Model* **2007**, *47* (2), 279–294.  
41 <https://doi.org/10.1021/ci600253e>.
- 42 (14) Cross, S.; Baroni, M.; Carosati, E.; Benedetti, P.; Clementi, S. FLAP: GRID Molecular  
43 Interaction Fields in Virtual Screening. Validation Using the DUD Data Set. *J Chem Inf Model*  
44 **2010**, *50* (8), 1442–1450. <https://doi.org/10.1021/ci100221g>.
- 45 (15) Siragusa, L.; Cross, S.; Baroni, M.; Goracci, L.; Cruciani, G. BioGPS: Navigating  
46 Biological Space to Predict Polypharmacology, Off-targeting, and Selectivity. *Proteins Struct*  
47 *Funct Bioinform* **2015**, *83* (3), 517–532. <https://doi.org/10.1002/prot.24753>.
- 48 (16) Siragusa, L.; Spyraakis, F.; Goracci, L.; Cross, S.; Cruciani, G. BioGPS: The Music for the  
49 Chemo- and Bioinformatics Walzer. *Mol. Inform.* **2014**, *33* (6-7), 446–453.  
50 <https://doi.org/10.1002/minf.201400028>.
- 51 (17) Vass, M.; Kooistra, A. J.; Yang, D.; Stevens, R. C.; Wang, M.-W.; Graaf, C. de. Chemical  
52 Diversity in the G Protein-Coupled Receptor Superfamily. *Trends Pharmacol Sci* **2018**, *39* (5),  
53 494–512. <https://doi.org/10.1016/j.tips.2018.02.004>.
- 54 (18) Berman, H. M.; Bhat, T. N.; Bourne, P. E.; Feng, Z.; Gilliland, G.; Weissig, H.; Westbrook,  
55 J. The Protein Data Bank and the Challenge of Structural Genomics. *Nat Struct Biol* **2000**, *7*  
56 (Suppl 11), 957–959. <https://doi.org/10.1038/80734>.
- 57 (19) Pándy-Szekeres, G.; Munk, C.; Tsonkov, T. M.; Mordalski, S.; Harpsøe, K.; Hauser, A. S.;  
58 Bojarski, A. J.; Gloriam, D. E. GPCRdb in 2018: Adding GPCR Structure Models and Ligands.  
59 *Nucleic Acids Res.* **2017**, *46* (Database issue), gkx1109-. <https://doi.org/10.1093/nar/gkx1109>.
- 60 (20) Pándy-Szekeres, G.; Caroli, J.; Mamyrbekov, A.; Kermani, A. A.; Keserű, G. M.; Kooistra,  
61 A. J.; Gloriam, D. E. GPCRdb in 2023: State-Specific Structure Models Using AlphaFold2 and  
62 New Ligand Resources. *Nucleic Acids Res.* **2022**, *51* (D1), D395–D402.  
63 <https://doi.org/10.1093/nar/gkac1013>.
- 64 (21) Halgren, T. A. Identifying and Characterizing Binding Sites and Assessing Druggability. *J*  
65 *Chem Inf Model* **2009**, *49* (2), 377–389. <https://doi.org/10.1021/ci800324m>.
- 66 (22) Tubert-Brohman, I.; Sherman, W.; Repasky, M.; Beuming, T. Improved Docking of  
67 Polypeptides with Glide. *J Chem Inf Model* **2013**, *53* (7), 1689–1699.  
68 <https://doi.org/10.1021/ci400128m>.

- 69 (23) Mason, J. S.; Bortolato, A.; Weiss, D. R.; Deflorian, F.; Tehan, B.; Marshall, F. H. High  
70 End GPCR Design: Crafted Ligand Design and Druggability Analysis Using Protein Structure,  
71 Lipophilic Hotspots and Explicit Water Networks. *Silico Pharmacol.* **2013**, *1* (1), 23.  
72 <https://doi.org/10.1186/2193-9616-1-23>.
- 73 (24) Bortolato, A.; Tehan, B. G.; Bodnarchuk, M. S.; Essex, J. W.; Mason, J. S. Water Network  
74 Perturbation in Ligand Binding: Adenosine A2A Antagonists as a Case Study. *J. Chem. Inf.*  
75 *Model.* **2013**, *53* (7), 1700–1713. <https://doi.org/10.1021/ci4001458>.
- 76 (25) Lomize, M. A.; Pogozheva, I. D.; Joo, H.; Mosberg, H. I.; Lomize, A. L. OPM Database  
77 and PPM Web Server: Resources for Positioning of Proteins in Membranes. *Nucleic Acids Res.*  
78 **2012**, *40* (D1), D370–D376. <https://doi.org/10.1093/nar/gkr703>.
- 79 (26) Lomize, M. A.; Lomize, A. L.; Pogozheva, I. D.; Mosberg, H. I. OPM: Orientations of  
80 Proteins in Membranes Database. *Bioinformatics* **2006**, *22* (5), 623–625.  
81 <https://doi.org/10.1093/bioinformatics/btk023>.
- 82 (27) Harding, S. D.; Armstrong, J. F.; Faccenda, E.; Southan, C.; Alexander, S. P. H.; Davenport,  
83 A. P.; Spedding, M.; Davies, J. A. The IUPHAR/BPS Guide to PHARMACOLOGY in 2024.  
84 *Nucleic Acids Res.* **2023**, gkad944. <https://doi.org/10.1093/nar/gkad944>.
- 85 (28) Davies, M.; Nowotka, M.; Papadatos, G.; Dedman, N.; Gaulton, A.; Atkinson, F.; Bellis, L.;  
86 Overington, J. P. ChEMBL Web Services: Streamlining Access to Drug Discovery Data and  
87 Utilities. *Nucleic Acids Res.* **2015**, *43* (W1), W612–W620. <https://doi.org/10.1093/nar/gkv352>.
- 88 (29) Zdrazil, B.; Felix, E.; Hunter, F.; Manners, E. J.; Blackshaw, J.; Corbett, S.; Veij, M. de;  
89 Ioannidis, H.; Lopez, D. M.; Mosquera, J. F.; Magarinos, M. P.; Bosc, N.; Arcila, R.; Kizilören,  
90 T.; Gaulton, A.; Bento, A. P.; Adasme, M. F.; Monecke, P.; Landrum, G. A.; Leach, A. R. The  
91 ChEMBL Database in 2023: A Drug Discovery Platform Spanning Multiple Bioactivity Data  
92 Types and Time Periods. *Nucleic Acids Res.* **2023**, gkad1004.  
93 <https://doi.org/10.1093/nar/gkad1004>.
- 94 (30) Landrum. *RDKit: Open-Source Cheminformatics*; 2022.
- 95 (31) Møller, T. C.; Moreno-Delgado, D.; Pin, J.-P.; Kniazeff, J. Class C G Protein-Coupled  
96 Receptors: Reviving Old Couples with New Partners. *Biophys. Rep.* **2017**, *3* (4–6), 57–63.  
97 <https://doi.org/10.1007/s41048-017-0036-9>.
- 98 (32) Li, X. X.; Lee, J. D.; Massey, N. L.; Guan, C.; Robertson, A. A. B.; Clark, R. J.; Woodruff,  
99 T. M. Pharmacological Characterisation of Small Molecule C5aR1 Inhibitors in Human Cells  
100 Reveals Biased Activities for Signalling and Function. *Biochem. Pharmacol.* **2020**, *180*, 114156.  
101 <https://doi.org/10.1016/j.bcp.2020.114156>.
- 102 (33) Leach, K.; Wen, A.; Cook, A. E.; Sexton, P. M.; Conigrave, A. D.; Christopoulos, A.  
103 Impact of Clinically Relevant Mutations on the Pharmacoregulation and Signaling Bias of the

- 104 Calcium-Sensing Receptor by Positive and Negative Allosteric Modulators. *Endocrinology*  
105 **2013**, *154* (3), 1105–1116. <https://doi.org/10.1210/en.2012-1887>.
- 106 (34) Nemeth, E. F.; Heaton, W. H.; Miller, M.; Fox, J.; Balandrin, M. F.; Wagenen, B. C. V.;  
107 Colloton, M.; Karbon, W.; Scherrer, J.; Shatzen, E.; Rishton, G.; Scully, S.; Qi, M.; Harris, R.;  
108 Lacey, D.; Martin, D. Pharmacodynamics of the Type II Calcimimetic Compound Cinacalcet  
109 HCl. *J. Pharmacol. Exp. Ther.* **2004**, *308* (2), 627–635. <https://doi.org/10.1124/jpet.103.057273>.
- 110 (35) Davey, A. E.; Leach, K.; Valant, C.; Conigrave, A. D.; Sexton, P. M.; Christopoulos, A.  
111 Positive and Negative Allosteric Modulators Promote Biased Signaling at the Calcium-Sensing  
112 Receptor. *Endocrinology* **2012**, *153* (3), 1232–1241. <https://doi.org/10.1210/en.2011-1426>.
- 113 (36) Leach, K.; Gregory, K. J.; Kufareva, I.; Khajehali, E.; Cook, A. E.; Abagyan, R.; Conigrave,  
114 A. D.; Sexton, P. M.; Christopoulos, A. Towards a Structural Understanding of Allosteric Drugs  
115 at the Human Calcium-Sensing Receptor. *Cell Res.* **2016**, *26* (5), 574–592.  
116 <https://doi.org/10.1038/cr.2016.36>.
- 117 (37) Zhuang, Y.; Krumm, B.; Zhang, H.; Zhou, X. E.; Wang, Y.; Huang, X.-P.; Liu, Y.; Cheng,  
118 X.; Jiang, Y.; Jiang, H.; Zhang, C.; Yi, W.; Roth, B. L.; Zhang, Y.; Xu, H. E. Mechanism of  
119 Dopamine Binding and Allosteric Modulation of the Human D1 Dopamine Receptor. *Cell Res.*  
120 **2021**, *31* (5), 593–596. <https://doi.org/10.1038/s41422-021-00482-0>.
- 121 (38) Müller, K.; Faeh, C.; Diederich, F. Fluorine in Pharmaceuticals: Looking Beyond Intuition.  
122 *Science* **2007**, *317* (5846), 1881–1886. <https://doi.org/10.1126/science.1131943>.
- 123 (39) Meanwell, N. A. Fluorine and Fluorinated Motifs in the Design and Application of  
124 Bioisosteres for Drug Design. *J. Med. Chem.* **2018**, *61* (14), 5822–5880.  
125 <https://doi.org/10.1021/acs.jmedchem.7b01788>.
- 126 (40) Price, M. R.; Baillie, G. L.; Thomas, A.; Stevenson, L. A.; Easson, M.; Goodwin, R.;  
127 McLean, A.; McIntosh, L.; Goodwin, G.; Walker, G.; Westwood, P.; Marrs, J.; Thomson, F.;  
128 Cowley, P.; Christopoulos, A.; Pertwee, R. G.; Ross, R. A. Allosteric Modulation of the  
129 Cannabinoid CB1 Receptor. *Mol. Pharmacol.* **2005**, *68* (5), 1484–1495.  
130 <https://doi.org/10.1124/mol.105.016162>.
- 131 (41) Shao, Z.; Yan, W.; Chapman, K.; Ramesh, K.; Ferrell, A. J.; Yin, J.; Wang, X.; Xu, Q.;  
132 Rosenbaum, D. M. Structure of an Allosteric Modulator Bound to the CB1 Cannabinoid  
133 Receptor. *Nat. Chem. Biol.* **2019**, *15* (12), 1199–1205. [https://doi.org/10.1038/s41589-019-0387-](https://doi.org/10.1038/s41589-019-0387-2)  
134 [2](https://doi.org/10.1038/s41589-019-0387-2).
- 135 (42) Cheng, R. K. Y.; Fiez-Vandal, C.; Schlenker, O.; Edman, K.; Aggeler, B.; Brown, D. G.;  
136 Brown, G. A.; Cooke, R. M.; Dumelin, C. E.; Doré, A. S.; Geschwindner, S.; Grebner, C.;  
137 Hermansson, N.-O.; Jazayeri, A.; Johansson, P.; Leong, L.; Prihandoko, R.; Rappas, M.; Soutter,  
138 H.; Snijder, A.; Sundström, L.; Tehan, B.; Thornton, P.; Troast, D.; Wiggin, G.; Zhukov, A.;  
139 Marshall, F. H.; Dekker, N. Structural Insight into Allosteric Modulation of Protease-Activated  
140 Receptor 2. *Nature* **2017**, *545* (7652), 112–115. <https://doi.org/10.1038/nature22309>.

- 141 (43) Jiao, H.; Pang, B.; Liu, A.; Chen, Q.; Pan, Q.; Wang, X.; Xu, Y.; Chiang, Y.-C.; Ren, R.;  
142 Hu, H. Structural Insights into the Activation and Inhibition of CXCR3 Chemokine Receptor 3. *Nat.*  
143 *Struct. Mol. Biol.* **2024**, 1–11. <https://doi.org/10.1038/s41594-023-01175-5>.
- 144 (44) Wang, X.; Wang, M.; Xu, T.; Feng, Y.; Shao, Q.; Han, S.; Chu, X.; Xu, Y.; Lin, S.; Zhao,  
145 Q.; Wu, B. Structural Insights into Dimerization and Activation of the MGLu2–MGLu3 and  
146 MGLu2–MGLu4 Heterodimers. *Cell Res.* **2023**, 33 (10), 762–774. <https://doi.org/10.1038/s41422-023-00830-2>.
- 148 (45) Wakefield, A. E.; Mason, J. S.; Vajda, S.; Keserű, G. M. Analysis of Tractable Allosteric  
149 Sites in G Protein-Coupled Receptors. *Sci. Rep.* **2019**, 9 (1), 6180.  
150 <https://doi.org/10.1038/s41598-019-42618-8>.
- 151 (46) Ding, T.; Karlov, D. S.; Pino-Angeles, A.; Tikhonova, I. G. Intermolecular Interactions in G  
152 Protein-Coupled Receptor Allosteric Sites at the Membrane Interface from Molecular Dynamics  
153 Simulations and Quantum Chemical Calculations. *J. Chem. Inf. Model.* **2022**, 62 (19), 4736–  
154 4747. <https://doi.org/10.1021/acs.jcim.2c00788>.
- 155 (47) Shah; Lind, C.; Pascali, F. D.; Penn, R. B.; Jr, A. D. M.; Deshpande, and D. A. In Silico  
156 Identification of a B2-Adrenoceptor Allosteric Site That Selectively Augments Canonical B2AR-  
157 Gs Signaling and Function. *Proceedings of the National Academy of Sciences* **2022**, 119,  
158 e2214024119.
- 159 (48) Inan, T.; Flinko, R.; Lewis, G. K.; MacKerell, A. D.; Kurkuoglu, O. Identifying and  
160 Assessing Putative Allosteric Sites and Modulators for CXCR4 Predicted through Network  
161 Modeling and Site Identification by Ligand Competitive Saturation. *J. Phys. Chem. B* **2024**, 128  
162 (21), 5157–5174. <https://doi.org/10.1021/acs.jpcc.4c00925>.
- 163 (49) Liu, H.; Kim, H. R.; Deepak, R. N. V. K.; Wang, L.; Chung, K. Y.; Fan, H.; Wei, Z.; Zhang,  
164 C. Orthosteric and Allosteric Action of the C5a Receptor Antagonists. *Nat. Struct. Mol. Biol.*  
165 **2018**, 25 (6), 472–481. <https://doi.org/10.1038/s41594-018-0067-z>.
- 166 (50) Mao, C.; Shen, C.; Li, C.; Shen, D.-D.; Xu, C.; Zhang, S.; Zhou, R.; Shen, Q.; Chen, L.-N.;  
167 Jiang, Z.; Liu, J.; Zhang, Y. Cryo-EM Structures of Inactive and Active GABAB Receptor. *Cell*  
168 *Res.* **2020**, 30 (7), 564–573. <https://doi.org/10.1038/s41422-020-0350-5>.
- 169 (51) Persechino, M.; Hedderich, J. B.; Kolb, P.; Hilger, D. Allosteric Modulation of GPCRs:  
170 From Structural Insights to in Silico Drug Discovery. *Pharmacol. Ther.* **2022**, 237, 108242.  
171 <https://doi.org/10.1016/j.pharmthera.2022.108242>.
- 172 (52) Burggraaff, L.; Veen, A. van; Lam, C. C.; Vlijmen, H. W. T. van; IJzerman, A. P.; Westen,  
173 G. J. P. van. Annotation of Allosteric Compounds to Enhance Bioactivity Modeling for Class A  
174 GPCRs. *J. Chem. Inf. Model.* **2020**, 60 (10), 4664–4672.  
175 <https://doi.org/10.1021/acs.jcim.0c00695>.

- 176 (53) Fasciani, I.; Petragano, F.; Aloisi, G.; Marampon, F.; Carli, M.; Scarselli, M.; Maggio, R.;  
177 Rossi, M. Allosteric Modulators of G Protein-Coupled Dopamine and Serotonin Receptors: A  
178 New Class of Atypical Antipsychotics. *Pharmaceuticals* **2020**, *13* (11), 388.  
179 <https://doi.org/10.3390/ph13110388>.
- 180 (54) Grundmann, M.; Bender, E.; Schamberger, J.; Eitner, F. Pharmacology of Free Fatty Acid  
181 Receptors and Their Allosteric Modulators. *Int. J. Mol. Sci.* **2021**, *22* (4), 1763.  
182 <https://doi.org/10.3390/ijms22041763>.
